# Supplementary material for: A somatic hypermutation–based machine learning model stratifies individuals with Crohn's disease and controls
Source: Genome Res. 2023 Jan;33(1):71–9. doi: 10.1101/gr.276683.122 (PMC9977146; doi:10.1101/gr.276683.122)
Supplement: Supplemental Material [file supp_gr.276683.122_Supplemental_Table_S1.xlsx]

## Sheet: sup
Volunteer	Age	Clinical state	Sex
FFC1	11.9	case	male
FFC100	15.1	control	female
FFC101	11	control	male
FFC102	15.2	control	female
FFC103	3.3	control	male
FFC105	10.3	case	female
FFC107	11.3	control	female
FFC11	13.3	control	male
FFC124	16.9	case	female
FFC13	15.9	case	male
FFC14	16	case	female
FFC16	8.5	case	male
FFC17	12.1	case	male
FFC21	17.6	case	female
FFC22	12.1	case	female
FFC23	15.6	case	male
FFC24	12.7	case	male
FFC27	13.3	case	female
FFC30	14.7	case	male
FFC33	15.5	control	female
FFC34	17.9	control	female
FFC35	11.6	control	male
FFC36	15.2	control	male
FFC37	13.8	control	male
FFC5	12.2	case	female
FFC51	16.9	case	female
FFC64	12	case	male
FFC65	11.8	case	male
FFC7	14.7	control	male
FFC74	14.3	case	male
FFC8	16.6	control	female
FFC80	16.3	control	female
FFC81	15.1	control	male
FFC82	14.2	case	male
FFC83	14.9	control	male
FFC84	15.9	case	female
FFC86	14.7	control	male
FFC87	16.6	control	female
FFC88	9.8	control	female
FFC89	6.8	control	female
FFC9	16.3	control	male
FFC91	10.5	case	male
FFC92	15.7	case	male
FFC93	17.1	case	female
FFC94	9	case	male
FFC95	11.2	case	male
FFC96	16.2	control	female
FFC97	16.7	control	female
FFC98	14.1	control	female
FFC99	14.1	control	female

## Sheet: README
Supplemental Table S1
Table S1 provides information on the age and sex of all study's volunteers
