# Supplementary material for: A somatic hypermutation–based machine learning model stratifies individuals with Crohn's disease and controls
Source: Genome Res. 2023 Jan;33(1):71–9. doi: 10.1101/gr.276683.122 (PMC9977146; doi:10.1101/gr.276683.122)
Supplement: Supplemental Material [file supp_gr.276683.122_Supplemental_Table_S2.xlsx]

## Sheet: Sheet 1
id	substiA_AAAAA	substiA_AAAAC	substiA_AAAAG	substiA_AAAAT	substiA_AAAAN	substiA_AAACA	substiA_AAACC	substiA_AAACG	substiA_AAACT	substiA_AAACN	substiA_AAAGA	substiA_AAAGC	substiA_AAAGG	substiA_AAAGT	substiA_AAAGN	substiA_AAATA	substiA_AAATC	substiA_AAATG	substiA_AAATT	substiA_AAATN	substiA_AAANA	substiA_AAANC	substiA_AAANG	substiA_AAANT	substiA_AAANN	substiA_AACAA	substiA_AACAC	substiA_AACAG	substiA_AACAT	substiA_AACAN	substiA_AACCA	substiA_AACCC	substiA_AACCG	substiA_AACCT	substiA_AACCN	substiA_AACGA	substiA_AACGC	substiA_AACGG	substiA_AACGT	substiA_AACGN	substiA_AACTA	substiA_AACTC	substiA_AACTG	substiA_AACTT	substiA_AACTN	substiA_AACNA	substiA_AACNC	substiA_AACNG	substiA_AACNT
FFC1	0	0	0	0	0	0	0	0	0	0	0	0	0	0	0	0	0	0	0	0	0	0	0	0	0	0.22953	0.290272	0.0291587	0.0786517	0.156903	0.0132626	0.175439	0.0100671	0.234632	0.10835	0.0867703	0.0895055	0.0867703	0.0869761	0.0875056	0.0273973	0.00611621	0.0655738	0.1297	0.0571968	0.0892401	0.140333	0.0478925	0.13249
FFC100	0	0	0	0	0	0	0	0	0	0	0	0	0	0	0	0	0	0	0	0	0	0	0	0	0	0.126488	0.27686	0.0747384	0.152174	0.157565	0.0129032	0.0915033	0.05	0.166667	0.0802683	0.0878981	0.0492308	0.0881226	0.092511	0.0794406	0.123077	0.105134	0.038674	0.0868944	0.0884449	0.0875916	0.130682	0.0628838	0.124561
FFC101	0	0	0	0	0	0	0	0	0	0	0	0	0	0	0	0	0	0	0	0	0	0	0	0	0	0.144321	0.0263158	0.124365	0.105919	0.10023	0.0178862	0.127461	0.00653595	0.155229	0.0767781	0.0744405	0.00826446	0.0743977	0.0806943	0.0594493	0.264195	0.0205066	0.333333	0.0937565	0.177948	0.125211	0.045637	0.134658	0.1089
FFC102	0	0	0	0	0	0	0	0	0	0	0	0	0	0	0	0	0	0	0	0	0	0	0	0	0	0.200931	0.127273	0.21895	0.191958	0.184778	0.0827423	0.0465116	0.147019	0.152656	0.107232	0.148718	0.17037	0.149742	0.171836	0.160166	0.178971	0.221402	0.0272277	0.0875622	0.128791	0.152841	0.141389	0.135735	0.151003
FFC103	0	0	0	0	0	0	0	0	0	0	0	0	0	0	0	0	0	0	0	0	0	0	0	0	0	0.0243902	0.151292	0.083739	0.0283401	0.0719402	0.128571	0.115385	0.0060241	0.144675	0.0986637	0.121173	0.1	0.12633	0.12633	0.118458	0.113757	0.0494382	0.00268097	0.0749678	0.0602109	0.0969729	0.104029	0.0546935	0.0935781
FFC105	0	0	0	0	0	0	0	0	0	0	0	0	0	0	0	0	0	0	0	0	0	0	0	0	0	0.0215139	0.0517241	0.010467	0.0220994	0.0264511	0.0192008	0.00983607	0.0180703	0.0188614	0.0164921	0.198377	0.058753	0.198377	0.198377	0.163471	0.917323	0.111041	0.388462	0.110996	0.381955	0.289104	0.0578385	0.153844	0.0875835
FFC107	0	0	0	0	0	0	0	0	0	0	0	0	0	0	0	0	0	0	0	0	0	0	0	0	0	0.132083	0.0504886	0.102342	0.163043	0.111989	0.0730769	0.0415094	0.0192308	0.115209	0.0622566	0.105166	0.419355	0.106014	0.107121	0.184414	0.0696203	0.0888325	0.0165746	0.0602731	0.0588251	0.0949866	0.150046	0.0610402	0.111412
FFC11	0	0	0	0	0	0	0	0	0	0	0	0	0	0	0	0	0	0	0	0	0	0	0	0	0	0.01	0.0590577	0.130131	0.17907	0.0945647	0.0156454	0.17429	0.225954	0.140515	0.139101	0.114987	0.190751	0.115199	0.116438	0.134344	0.0784901	0.0379747	0.0274585	0.108116	0.0630098	0.0547807	0.115519	0.124686	0.136035
FFC124	0	0	0	0	0	0	0	0	0	0	0	0	0	0	0	0	0	0	0	0	0	0	0	0	0	0.194237	0.248577	0.0403509	0.484716	0.24197	0.00503778	0.00696056	0.016129	0.154804	0.0457328	0.121581	0.123239	0.121704	0.125126	0.122912	0.0205128	0.0416667	0.274218	0.0725719	0.102242	0.0853421	0.105111	0.1131	0.209304
FFC13	0	0	0	0	0	0	0	0	0	0	0	0	0	0	0	0	0	0	0	0	0	0	0	0	0	0.123321	0.11596	0.131459	0.00278552	0.0933814	0.162963	0.0582822	0.00755668	0.093862	0.080666	0.0288724	0.0261324	0.0288724	0.0290618	0.0282348	0.192878	0.0228789	0.0290416	0.0905279	0.0838317	0.127009	0.0558134	0.0492325	0.0540593
FFC14	0	0	0	0	0	0	0	0	0	0	0	0	0	0	0	0	0	0	0	0	0	0	0	0	0	0.124353	0.251053	0.265878	0.104396	0.18642	0.0126468	0.0107681	0.100796	0.0991686	0.0558448	0.10701	0.179163	0.107128	0.107374	0.125169	0.0255668	0.0380878	0.080298	0.0622724	0.0515563	0.0673941	0.119768	0.138525	0.0933027
FFC16	0	0	0	0	0	0	0	0	0	0	0	0	0	0	0	0	0	0	0	0	0	0	0	0	0	0.00980392	0.0321637	0.0308219	0.00862069	0.0203526	0.015625	0.0204918	0.353075	0.188409	0.1444	0.044926	0.0896552	0.044926	0.044926	0.0561083	0.216478	0.00686499	0.00759494	0.05737	0.072077	0.0717083	0.0372939	0.109105	0.0748314
FFC17	0	0	0	0	0	0	0	0	0	0	0	0	0	0	0	0	0	0	0	0	0	0	0	0	0	0.0880196	0.315472	0.195674	0.00262467	0.150447	0.0380242	0.00251256	0.0128205	0.0404762	0.0234584	0.137875	0.00362319	0.137875	0.137875	0.104312	0.00463499	0.00352113	0.145522	0.0781157	0.0579486	0.0671385	0.0812823	0.122973	0.064773
FFC21	0	0	0	0	0	0	0	0	0	0	0	0	0	0	0	0	0	0	0	0	0	0	0	0	0	0.0677268	0.11715	0.0514745	0.00221729	0.0596421	0.0033557	0.0013587	0.00771208	0.212066	0.0561232	0.132739	0.197125	0.132739	0.133193	0.148949	0.130691	0.00235738	0.0375635	0.133475	0.0760217	0.0836281	0.0794978	0.0573722	0.120238
FFC22	0	0	0	0	0	0	0	0	0	0	0	0	0	0	0	0	0	0	0	0	0	0	0	0	0	0.0920267	0.295226	0.144838	0.0922698	0.15609	0.152091	0.230146	0.478723	0.236413	0.274343	0.18772	0.179715	0.190896	0.0710059	0.157334	0.244645	0.00511073	0.561175	0.117025	0.231989	0.169121	0.17755	0.343908	0.129178
FFC23	0	0	0	0	0	0	0	0	0	0	0	0	0	0	0	0	0	0	0	0	0	0	0	0	0	0.0587151	0.194993	0.00441362	0.00146413	0.0648966	0.00213675	0.0388248	0.00323625	0.124868	0.0422665	0.146273	0.118674	0.150072	0.180114	0.148783	0.0419485	0.0676127	0.0516095	0.0427431	0.0509785	0.0622684	0.105026	0.0523328	0.0872973
FFC24	0	0	0	0	0	0	0	0	0	0	0	0	0	0	0	0	0	0	0	0	0	0	0	0	0	0.108483	0.0154255	0.00383436	0.10828	0.0590058	0.12987	0.0248447	0.00684262	0.0146885	0.0440615	0.0171569	0.0174868	0.0171569	0.0171569	0.0172393	0.0303766	0.00537634	0.00484653	0.030243	0.0177106	0.0714716	0.0157833	0.00817009	0.0425922
FFC27	0	0	0	0	0	0	0	0	0	0	0	0	0	0	0	0	0	0	0	0	0	0	0	0	0	0.127432	0.0125698	0.12973	0.124035	0.0984417	0.134141	0.258514	0.135849	0.143507	0.168003	0.113969	0.101115	0.113969	0.113969	0.110756	0.0979766	0.00412979	0.539474	0.0766719	0.179563	0.11838	0.0940821	0.229755	0.114546
FFC30	0	0	0	0	0	0	0	0	0	0	0	0	0	0	0	0	0	0	0	0	0	0	0	0	0	0.0946252	0.0722611	0.121041	0.0196078	0.0768837	0.00369004	0.133427	0.381295	0.152148	0.16764	0.129248	0.142197	0.129435	0.144878	0.13644	0.102526	0.0771208	0.0458404	0.100388	0.0814689	0.0825224	0.106251	0.169403	0.104256
FFC33	0	0	0	0	0	0	0	0	0	0	0	0	0	0	0	0	0	0	0	0	0	0	0	0	0	0.184341	0.0323383	0.0232877	0.185012	0.106245	0.214307	0.506098	0.224782	0.224782	0.292492	0.0267857	0.0257787	0.0267857	0.0267857	0.026534	0.0512821	0.0489551	0.0491521	0.0504499	0.0499598	0.119179	0.153292	0.0810019	0.121757
FFC34	0	0	0	0	0	0	0	0	0	0	0	0	0	0	0	0	0	0	0	0	0	0	0	0	0	0.0758746	0.06238	0.128973	0.00672269	0.0684875	0.00765306	0.132296	0.00164745	0.0824003	0.0559991	0.0780586	0.0232558	0.0781985	0.0946303	0.0685358	0.114846	0.0511408	0.0212291	0.0701349	0.0643377	0.069108	0.0672681	0.0575119	0.063472
FFC35	0	0	0	0	0	0	0	0	0	0	0	0	0	0	0	0	0	0	0	0	0	0	0	0	0	0.124391	0.155019	0.159261	0.0040568	0.110682	0.0104302	0.0233333	0.0201342	0.107463	0.0403402	0.0627625	0.165766	0.063137	0.0630117	0.0886692	0.101538	0.0842311	0.115942	0.0923244	0.098509	0.0747806	0.107087	0.0896187	0.066714
FFC36	0	0	0	0	0	0	0	0	0	0	0	0	0	0	0	0	0	0	0	0	0	0	0	0	0	0.0955368	0.097177	0.130627	0.0106952	0.0835089	0.425101	0.0217786	0.086785	0.148723	0.170597	0.0868549	0.0831063	0.08888	0.107206	0.0915117	0.122987	0.0594488	0.0371257	0.104607	0.081042	0.18262	0.0653777	0.0858544	0.0928076
FFC37	0	0	0	0	0	0	0	0	0	0	0	0	0	0	0	0	0	0	0	0	0	0	0	0	0	0.0698408	0.0181518	0.0197964	0.0700192	0.0444521	0.00296296	0.130246	0.00257069	0.0211526	0.0392331	0.0447716	0.0602269	0.0454268	0.0454268	0.0489631	0.00636943	0.00642398	0.0507504	0.0537046	0.0293121	0.0309862	0.0537622	0.0296361	0.0475758
FFC5	0	0	0	0	0	0	0	0	0	0	0	0	0	0	0	0	0	0	0	0	0	0	0	0	0	0.156738	0.019943	0.191244	0.152099	0.130006	0.0059761	0.0196078	0.101138	0.101231	0.0569882	0.0641738	0.0666335	0.0673026	0.0677966	0.0664766	0.0663717	0.0014245	0.0752056	0.0941625	0.0592911	0.0733148	0.0269022	0.108723	0.103822
FFC51	0	0	0	0	0	0	0	0	0	0	0	0	0	0	0	0	0	0	0	0	0	0	0	0	0	0.14006	0.159868	0.149709	0.146938	0.149143	0.00959233	0.0474934	0.174359	0.171829	0.100818	0.116773	0.01	0.117271	0.112831	0.0892187	0.0973783	0.106091	0.150546	0.106388	0.115101	0.0909508	0.0808631	0.147971	0.134496
FFC64	0	0	0	0	0	0	0	0	0	0	0	0	0	0	0	0	0	0	0	0	0	0	0	0	0	0.142045	0.239186	0.063192	0.192488	0.159228	0.0557119	0.0482846	0.0440332	0.154067	0.0755242	0.0955391	0.192982	0.0958464	0.0980043	0.120593	0.118071	0.0559763	0.148931	0.0720641	0.0987606	0.102842	0.134107	0.0880005	0.129156
FFC65	0	0	0	0	0	0	0	0	0	0	0	0	0	0	0	0	0	0	0	0	0	0	0	0	0	0.148827	0.167347	0.188306	0.0147059	0.129796	0.194631	0.0176991	0.181234	0.18094	0.143626	0.110222	0.0192308	0.110714	0.110714	0.0877204	0.0941558	0.132353	0.0403587	0.0673901	0.0835644	0.136959	0.0841574	0.130153	0.0934376
FFC7	0	0	0	0	0	0	0	0	0	0	0	0	0	0	0	0	0	0	0	0	0	0	0	0	0	0.0985418	0.0890688	0.0824456	0.00299401	0.0682625	0.0150376	0.070348	0.00784314	0.0748198	0.0420121	0.073343	0.0283688	0.0744412	0.0744412	0.0626485	0.120799	0.189794	0.00123001	0.063117	0.0937351	0.0769304	0.0943949	0.04149	0.053843
FFC74	0	0	0	0	0	0	0	0	0	0	0	0	0	0	0	0	0	0	0	0	0	0	0	0	0	0.120223	0.0920437	0.0801782	0.0989761	0.0978553	0.0637584	0.0251572	0.0658436	0.130568	0.0713319	0.12041	0.228856	0.121394	0.127614	0.149568	0.0429799	0.0674419	0.0728346	0.0931489	0.0691013	0.086843	0.103375	0.0850625	0.112577
FFC8	0	0	0	0	0	0	0	0	0	0	0	0	0	0	0	0	0	0	0	0	0	0	0	0	0	0.0316344	0.0829678	0.152748	0.201773	0.117281	0.00402901	0.0320256	0.00251572	0.115738	0.0385771	0.0823725	0.00505689	0.0750571	0.0751193	0.0594015	0.0346964	0.279723	0.355217	0.0736282	0.185816	0.0381831	0.0999434	0.146384	0.116564
FFC80	0	0	0	0	0	0	0	0	0	0	0	0	0	0	0	0	0	0	0	0	0	0	0	0	0	0.197992	0.298837	0.231362	0.203411	0.232901	0.111111	0.47448	0.428571	0.123511	0.284418	0.163317	0.135688	0.163317	0.220464	0.170697	0.0774908	0.00165426	0.135751	0.0583719	0.0683171	0.137478	0.227665	0.239751	0.15144
FFC81	0	0	0	0	0	0	0	0	0	0	0	0	0	0	0	0	0	0	0	0	0	0	0	0	0	0.104449	0.19701	0.129086	0.111623	0.135542	0.00309187	0.0183566	0.00578704	0.0290534	0.0140722	0.130929	0.0123457	0.130929	0.130929	0.101283	0.589165	0.0183673	0.0027533	0.0956581	0.176486	0.206909	0.06152	0.0671388	0.0918157
FFC82	0	0	0	0	0	0	0	0	0	0	0	0	0	0	0	0	0	0	0	0	0	0	0	0	0	0.00645161	0.0868925	0.105634	0.0989761	0.0744885	0.0326531	0.132597	0.0485437	0.164635	0.0946072	0.103809	0.0837696	0.106804	0.106474	0.100214	0.116188	0.0657895	0.108669	0.0985805	0.0973068	0.0647754	0.0922621	0.0924128	0.117166
FFC83	0	0	0	0	0	0	0	0	0	0	0	0	0	0	0	0	0	0	0	0	0	0	0	0	0	0.003861	0.284129	0.153975	0.105634	0.1369	0.153846	0.0427892	0.0495951	0.0894367	0.0839168	0.0922804	0.178791	0.0925385	0.0998629	0.115868	0.118343	0.0749049	0.050962	0.0673655	0.0778939	0.0920827	0.145153	0.0867676	0.0905747
FFC84	0	0	0	0	0	0	0	0	0	0	0	0	0	0	0	0	0	0	0	0	0	0	0	0	0	0.0153374	0.130463	0.113629	0.0335008	0.0732325	0.0237366	0.0559937	0.127128	0.117966	0.0812063	0.0732455	0.106811	0.0733579	0.0754947	0.0822273	0.0483871	0.0608798	0.27897	0.10121	0.122362	0.0401767	0.0885369	0.148271	0.0820431
FFC86	0	0	0	0	0	0	0	0	0	0	0	0	0	0	0	0	0	0	0	0	0	0	0	0	0	0.0178571	0.189343	0.0962403	0.0753656	0.0947015	0.0730368	0.0894621	0.107143	0.146124	0.103942	0.0840873	0.126841	0.0848693	0.0875031	0.0958252	0.134872	0.0558548	0.0564545	0.104909	0.0880224	0.0774632	0.115375	0.0861768	0.103475
FFC87	0	0	0	0	0	0	0	0	0	0	0	0	0	0	0	0	0	0	0	0	0	0	0	0	0	0.0552995	0.268943	0.143929	0.129032	0.149301	0.0777311	0.122601	0.0187266	0.131011	0.0875174	0.0816017	0.0407359	0.0828585	0.0929809	0.0745442	0.167928	0.095941	0.171602	0.117106	0.138144	0.0956402	0.132055	0.104279	0.117532
FFC88	0	0	0	0	0	0	0	0	0	0	0	0	0	0	0	0	0	0	0	0	0	0	0	0	0	0.0994529	0.0332326	0.126048	0.101292	0.0900062	0.0965909	0.013289	0.0270833	0.101782	0.0596864	0.0532953	0.0217984	0.0534639	0.0537489	0.0455766	0.0534395	0.00849673	0.135359	0.0796037	0.0692247	0.0756946	0.0192042	0.0854885	0.0841067
FFC89	0	0	0	0	0	0	0	0	0	0	0	0	0	0	0	0	0	0	0	0	0	0	0	0	0	0.0428571	0.0821918	0.180443	0.115578	0.105267	0.0773621	0.0573188	0.068	0.106486	0.0772918	0.117141	0.0717912	0.121733	0.301887	0.153138	0.0809816	0.0869565	0.0715667	0.0977286	0.0843084	0.0795856	0.0745646	0.110436	0.15542
FFC9	0	0	0	0	0	0	0	0	0	0	0	0	0	0	0	0	0	0	0	0	0	0	0	0	0	0.115486	0.00276243	0.211129	0.115435	0.111203	0.0105603	0.0033557	0.00261097	0.0118421	0.00709226	0.00862999	0.00851466	0.00862999	0.00862999	0.00860116	0.0448143	0.426263	0.0429938	0.0461959	0.140067	0.0448727	0.110224	0.066341	0.0455258
FFC91	0	0	0	0	0	0	0	0	0	0	0	0	0	0	0	0	0	0	0	0	0	0	0	0	0	0.00251256	0.174549	0.142519	0.0858369	0.101354	0.0159262	0.104134	0.0813008	0.137792	0.0847884	0.232698	0.00649351	0.235192	0.804651	0.319759	0.123671	0.0860635	0.0299065	0.104551	0.086048	0.0937021	0.09281	0.12223	0.283208
FFC92	0	0	0	0	0	0	0	0	0	0	0	0	0	0	0	0	0	0	0	0	0	0	0	0	0	0.120019	0.309232	0.0772078	0.0283784	0.133709	0.160648	0.2	0.097925	0.100783	0.139839	0.0746611	0.00576037	0.0758796	0.076011	0.058078	0.249526	0.00050226	0.0163488	0.0800196	0.0865992	0.151213	0.128874	0.0668403	0.071298
FFC93	0	0	0	0	0	0	0	0	0	0	0	0	0	0	0	0	0	0	0	0	0	0	0	0	0	0.714964	0.0779587	0.2262	0.150786	0.292477	0.00762712	0.0527231	0.00387097	0.141385	0.0514015	0.100077	0.288168	0.102243	0.1024	0.148222	0.08378	0.119433	0.0676983	0.0947599	0.0914178	0.226612	0.134571	0.100003	0.122333
FFC94	0	0	0	0	0	0	0	0	0	0	0	0	0	0	0	0	0	0	0	0	0	0	0	0	0	0.00591716	0.0219697	0.149602	0.00758054	0.0462673	0.0144201	0.0116681	0.307692	0.0829428	0.104181	0.158168	0.288079	0.158658	0.160299	0.191301	0.073697	0.112178	0.0019861	0.0903819	0.0695606	0.0630506	0.108474	0.154485	0.0853011
FFC95	0	0	0	0	0	0	0	0	0	0	0	0	0	0	0	0	0	0	0	0	0	0	0	0	0	0.138618	0.260912	0.132686	0.0208551	0.138268	0.0464326	0.116142	0.0226131	0.151062	0.0840623	0.107306	0.0418079	0.107902	0.113417	0.0926083	0.211721	0.0416667	0.105799	0.0966288	0.113954	0.126019	0.115132	0.09225	0.0954907
FFC96	0	0	0	0	0	0	0	0	0	0	0	0	0	0	0	0	0	0	0	0	0	0	0	0	0	0.135024	0.095504	0.0670712	0.0226537	0.0800634	0.0085922	0.0668088	0.00619195	0.109186	0.0476949	0.0692383	0.0314371	0.0705955	0.0808589	0.0630325	0.208106	0.133001	0.0645695	0.106789	0.128117	0.10524	0.0816879	0.0521071	0.079872
FFC97	0	0	0	0	0	0	0	0	0	0	0	0	0	0	0	0	0	0	0	0	0	0	0	0	0	0.604878	0.117843	0.112849	0.206564	0.260533	0.0484581	0.106903	0.177756	0.157846	0.122741	0.106141	0.0174731	0.107997	0.107969	0.0848951	0.111765	0.0780025	0.213223	0.0854201	0.122103	0.21781	0.0800554	0.152956	0.13945
FFC98	0	0	0	0	0	0	0	0	0	0	0	0	0	0	0	0	0	0	0	0	0	0	0	0	0	0.0348812	0.00821596	0.01245	0.0413223	0.0242174	0.00214362	0.00947306	0.0376344	0.111377	0.040157	0.0775287	0.00403633	0.0775287	0.128959	0.0720132	0.00351617	0.0122249	0.359974	0.0950576	0.117693	0.0295174	0.00848757	0.121897	0.094179
FFC99	0	0	0	0	0	0	0	0	0	0	0	0	0	0	0	0	0	0	0	0	0	0	0	0	0	0.0808625	0.138085	0.0590164	0.0807537	0.0896793	0.0211268	0.123445	0.0136986	0.128352	0.0716558	0.181026	0.0265487	0.181026	0.195052	0.145913	0.0721649	0.101887	0.197531	0.0702703	0.110463	0.0887951	0.0974914	0.112818	0.118607
[truncated: 5,000 more columns]

## Sheet: README
Supplemental Table S2
Table S2 shows the SHM matrix for all repertoire
